# Supplementary material for: Risk factors for persistent abnormality on chest radiographs at 12-weeks post hospitalisation with PCR confirmed COVID-19
Source: Research Square preprint supplement (doi:10.21203/rs.3.rs-144091/v1), 2021-01-15
Supplement: Supplementary file 1 [file 968d95c132360603886046d6.docx]

**Online Data Supplement**

**Risk factors for persistent abnormality on chest radiographs at 12-weeks post hospitalisation with PCR confirmed COVID-19.**

**Authors** TJM Wallis1, E Heiden2, J Horno2, B Welham3, H Burke3, A Freeman3, L Dexter2, A Fazleen3, A, Kong1, C McQuitty1, M Watson2, S Poole4, NJ Brendish5, TW Clark4, TMA Wilkinson1, MG Jones1* and BG Marshall1*

*Joint Last Author

Corresponding Author: Dr Tim Wallis NIHR Southampton Biomedical Research Centre Research Fellow. MP218 D-Level South Academic Block University Hospital Southampton SO16 6YD. email timothy.wallis@soton.ac.uk

**Supplemental Materials**

**Supplemental Figure 1**

**
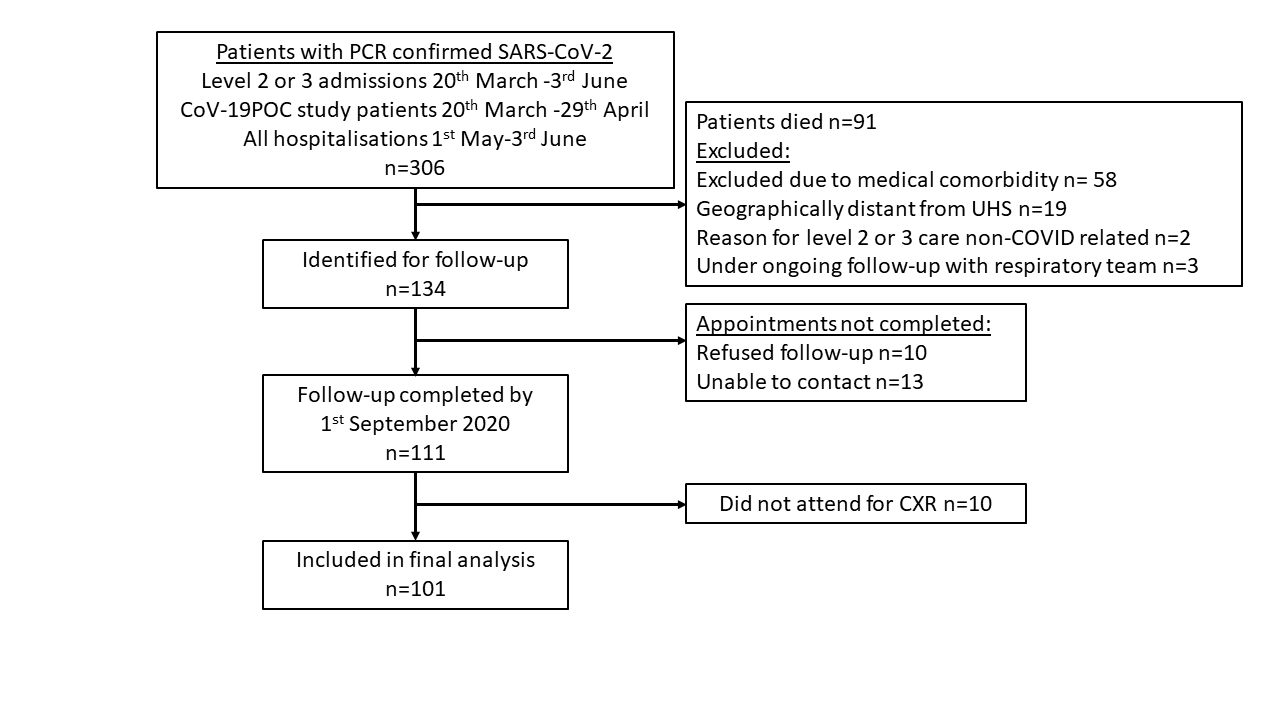
**

**Supplemental Figure 1** Consolidation Standards of Reporting Trials (CONSORT) Figure (1) for the cohort. UHS University Hospital Southampton Foundation Trust. All patients screened had PCR confirmed SARS-CoV-2 infection. Level 2 (High Dependency Facility), Level 3 (Intensive Care Facility) CXR- Chest Radiograph.

**Supplemental Information**

**Patients with pulmonary fibrosis identified on Chest computed tomography (CT) scanning**

Of patients who had fibrosis identified on Chest CT; six received invasive mechanical ventilation (IMV), in addition one of these also underwent Extracorporeal membrane oxygenation (ECMO), two patients received supplemental oxygen therapy only.

**Patient 1**

Highest Respiratory Support: IMV

CT Appearances: Multifocal scarring with traction bronchiectasis

**Patient 2**

Highest Respiratory Support: IMV

CT Appearances: Multifocal consolidation and ground glass opacification

**Patient 3**

Highest Respiratory Support: IMV

CT Appearances: Non-specific pattern of course subpleural and peri-bronchial pulmonary fibrosis with irregular septal thickening and traction bronchiectasis but without honeycombing. Minor ground-glass component.

**Patient 4**

Highest Respiratory Support: IMV

CT Appearances: Bilateral, apical predominant ground-glass opacification with mild/moderate peri-bronchial and subpleural fibrosis with traction bronchiectasis, reticulation and irregular septal thickening but no honeycombing.

**Patient 5:**

Highest Respiratory Support: ECMO

CT Appearances: Extensive bilateral interlobular septal thickening, atelectasis and ground-glass opacification.

**Patient 6:**

Highest Respiratory Support: IMV

CT Appearances: Peripheral upper lobe predominant linear subpleural fibrosis without honeycombing

**Patient 7**:

Highest Respiratory Support: Oxygen

CT Appearances: subpleural ground glass attenuation and reticulation minor traction bronchiectasis no honeycombing.

**Patient 8:**

Highest Respiratory Support: Oxygen

CT Appearances: Mild Ground-glass opacification and subpleural consolidation

**References**

1. Rennie D. CONSORT revised--improving the reporting of randomized trials. Jama. 2001;285(15):2006-7.
